# Supplementary material for: Long term longitudinal follow-up of an AD-HIES cohort: the impact of early diagnosis and enrollment to IPINet centers on the natural history of Job’s syndrome
Source: Allergy Asthma Clin Immunol. 2023 Apr 20;19:32. doi: 10.1186/s13223-023-00776-5 (PMC10115605; doi:10.1186/s13223-023-00776-5)
Supplement: Supplementary file 1 — Additional file 1 - Table S1. The table details findings (signs and symptoms) at onset, diagnosis, overall follow up and latest follow up. [file 13223_2023_776_MOESM1_ESM.xlsx]

## Sheet: table data synthesis
signs and symptoms	at onset (%)	N	follow up total (%)	N		signs and symptoms	at dignosis (%)	N	latest follow up (%)	N				N tot	N	%
eczema (overall)	86.7	26	63.3	19		skin involvement	93.3	28	63.3	19			started with therapy at diagnosis	30	21	70.0
eczema in typical site	26.9	7/26	73.7	14/19		eczema	80.0	26	60.0	18			therapy for skin	21	15	71.4
diffuse eczema	69.2	18/26	63.2	12/19
persistent eczema	-	-	73.7	14/19		persistent eczema	80.8	21/26	73.7	14/19			cotrimoxazole	20	18	90.0
mild eczema	38.5	10/26	36.8	7/19									other antibiotic	20	2	10
severe eczema	61.5	16/26	42.1	8/19									anti-fungal prophylaxys	21	12	66.7
newborn rash	50.0	15											fluconazole	12	6	42.9
							at dignosis (%)	N	latest follow up (%)	N			other anti-fungal prophylaxys	12	6	57.1	1 vorico + 5 itra
skin abscess	76.7	23	56.7	17									anti-viral therapy	21	2	9.5
						abscess	66.7	20	50.0	15
						pyodermitis	33.3	10	30.0	9
warts	3.3	1	6.7	2		warts	6.7	2	0	0			anti-pneumococcical vaccination	30	8	26.7
herpes simplex virus	6.7	2				herpes simplex virus infection	10.0	3	3.3	1			immunoglobulins replacement therapy	30	2	6.7
						onychomycosis	56.7	17	40.0	12
						oral candidiasis	6.7	2	23.3	7		*
Mucocutaneous candidiasis			56.7	17		Mucocutaneous candidiasis	70.0	21
Molluscum contagiosum	6.7	2	0	0
others kind	0	0	23.3	7
	at onset (%)	N	follow up total (%)	N			at dignosis (%)	N	latest follow up (%)	N
infections (overall)	96.7	29				airways involvement	73.3	22	56.7	17
						airways infections
pneumonia	76.7	23	46.7	14		pneumonia	56.7	17	53.3	16
						pathological lung CT-scan	50.0	15	53.3	16
pneunomatoceles	diag	diag	46.7	14		pneumomatoceles	43.3	13	46.7	14
						bronchiectasis	46.7	14	53.3	16
interstial pneumonia	6.7	2	0	0		allergic asthma	6.7	2
Sinusitis	30.0	9	36.7	11		Sinusitis	30.0	9	23.3	7
						pathological maxillo-facial CT-scan	23.3	7	23.3	7
Otitis	46.7	14	13.3	4		Staphylococcus aureus colonization (MRSA)			10.0	3
	at onset and/or at diagnosis (%)	N	follow up total (%)	N		signs and symptoms	at dignosis (%)	N	latest follow up (%)	N
meningitis	3.3	1	0	0		gastroenteric involvement	10.0	3
deep abscess	76.7	23	60.0	18		chronic diarrhoea	3.3	1	10.0	3
sepsis	6.7	2	3.3	1		urinary tract infections	3.3	1	10.0	3
invasive fungal infection	13.3	4	0	0
osteomyelitis	6.7	2	3.3	1
	at onset (%)	N	follow up total (%)	N			at dignosis (%)	N	latest follow up (%)	N
Gastroenteritis	16.7	5	23.3	7		skeletral signs (overall)	93.3	93.3
						high palate	50.0	15	50.0	15
cancer (overall)	6.7	2				characteristic face	83.3	25	86.7	26
lymphoma	6.7	2				hyperextensive joints	30.0	9	43.3	13
allergy						fractures	30.0	9	30.0	9
allergic asthma			10.0	3		dysodontiasis (primary theeth retained)	56.7	17	63.3	19
food allergy	6.7	2	0	0		scoliosis	33.3	10	43.3	13
anaphylactic shock	3.3	1	3.3	1		osteoporosis	13.3	4	33.3	10
First Symptom	%	N
infection	76.7	23
immune dysregulation	23.3	7
no symptoms	10.0	3
